# Supplementary material for: Human Mesenchymal Stem Cell Expression Program upon Extended Ex-Vivo Cultivation, as Revealed by 2-DE-Based Quantitative Proteomics
Source: PubMed Central journal article supplement (PMC3423346; doi:10.1371/journal.pone.0043523), 2012-08-20
Supplement: pone.0043523.s001.pdf [file pone.0043523.s001.pdf]

## SUPPLEMENTARY MATERIAL

This document contains:

**Table S1** – Proteins identified in this work by mass spectrometry.

**Table S1** – Proteins identified in this work. For each protein, the accession number, theoretical *pI* and molecular weight are indicated. The protein identification was obtained by mass spectrometry.

| Spot (nr.)                                             | Protein function                                 | Accession Number | MW (kDa)/ <i>pI</i> | Mascot score | No. of matched peptides | Sequence coverage (%) |
|--------------------------------------------------------|--------------------------------------------------|------------------|---------------------|--------------|-------------------------|-----------------------|
| <b>Structural components and cellular cytoskeleton</b> |                                                  |                  |                     |              |                         |                       |
| 3                                                      | actin, cytoplasmic I; beta-actin ( <b>ACTB</b> ) | P0709            | 42.1/5.29           | 243          | 5                       | 18                    |
| 7                                                      |                                                  |                  | 42.1/5.29           | 244          | 6                       | 21                    |
| 35                                                     |                                                  |                  | 42.1/5.29           | 144          | 4                       | 13                    |
| 64                                                     |                                                  |                  | 42.1/5.29           | 158          | 3                       | 12                    |
| 81                                                     |                                                  |                  | 42.1/5.29           | 116          | 4                       | 13                    |
| 160                                                    |                                                  |                  | 42.1/5.29           | 356          | 15                      | 42                    |
| 171                                                    |                                                  |                  | 42.1/5.29           | 97           | 5                       | 18                    |
| 1                                                      | keratin, type II cytoskeletal I ( <b>KRT1</b> )  | P04264           | 66.1/8.15           | 154          | 12                      | 24                    |
| 59                                                     |                                                  |                  | 66.1/8.15           | 96           | 8                       | 17                    |
| 75                                                     |                                                  |                  | 66.1/8.15           | 58           | 5                       | 9                     |
| 158                                                    |                                                  |                  | 66.1/8.15           | 91           | 8                       | 15                    |
| 148                                                    | keratin, type I cytoskeletal 10 ( <b>KRT10</b> ) | P13645           | 59.0/5.13           | 85           | 7                       | 10                    |
| 178                                                    |                                                  |                  | 59.0/5.13           | 95           | 8                       | 18                    |
| 33                                                     | vimentin ( <b>VIM</b> )                          | P08670           | 53.7/5.06           | 128          | 7                       | 23                    |
| 39                                                     |                                                  |                  | 53.7/5.06           | 277          | 17                      | 29                    |
| 41                                                     |                                                  |                  | 53.7/5.06           | 249          | 16                      | 44                    |
| 55                                                     |                                                  |                  | 53.7/5.06           | 497          | 21                      | 41                    |
| 56                                                     |                                                  |                  | 53.7/5.06           | 258          | 13                      | 34                    |
| 58                                                     |                                                  |                  | 53.7/5.06           | 403          | 24                      | 49                    |
| 67                                                     |                                                  |                  | 53.7/5.06           | 294          | 16                      | 39                    |
| 74                                                     |                                                  |                  | 53.7/5.06           | 227          | 15                      | 37                    |
| 78                                                     |                                                  |                  | 53.7/5.06           | 406          | 22                      | 34                    |
| 79                                                     |                                                  |                  | 53.7/5.06           | 204          | 9                       | 21                    |
| 87                                                     |                                                  |                  | 53.7/5.06           | 82           | 3                       | 7                     |
| 106                                                    |                                                  |                  | 53.7/5.06           | 173          | 13                      | 29                    |
| 113                                                    |                                                  |                  | 53.7/5.06           | 248          | 12                      | 27                    |
| 124                                                    |                                                  |                  | 53.7/5.06           | 160          | 10                      | 30                    |
| 128                                                    |                                                  |                  | 53.7/5.06           | 103          | 6                       | 16                    |
| 131                                                    |                                                  |                  | 53.7/5.06           | 400          | 18                      | 39                    |

| Spot (nr.)                                              | Protein function                                                                                   | Accession Number | MW (kDa)/ pI | Mascot score | No. of matched peptides | Sequence coverage (%) |
|---------------------------------------------------------|----------------------------------------------------------------------------------------------------|------------------|--------------|--------------|-------------------------|-----------------------|
| 202                                                     |                                                                                                    |                  | 53.7/5.06    | 164          | 9                       | 27                    |
| 484                                                     |                                                                                                    |                  | 53.7/5.06    | 318          | 20                      | 45                    |
| 603                                                     |                                                                                                    |                  | 53.7/5.06    | 713          | 33                      | 63                    |
| 98                                                      |                                                                                                    |                  | 53.7/5.06    | 157          | 15                      | 46                    |
| 121                                                     |                                                                                                    |                  | 53.7/5.06    | 192          | 11                      | 29                    |
| 146                                                     |                                                                                                    |                  | 53.7/5.06    | 157          | 9                       | 24                    |
| 198                                                     |                                                                                                    |                  | 53.7/5.06    | 883          | 29                      | 59                    |
| 236                                                     |                                                                                                    |                  | 53.7/5.06    | 101          | 6                       | 16                    |
| 353                                                     |                                                                                                    |                  | 35.1/4.7     | 225          | 9                       | 37                    |
| 795                                                     |                                                                                                    |                  | 53.7/5.06    | 414          | 24                      | 57                    |
| 849                                                     |                                                                                                    |                  | 53.7/5.06    | 279          | 20                      | 48                    |
| 879                                                     |                                                                                                    |                  | 53.7/5.06    | 288          | 16                      | 35                    |
| 20                                                      | macrophage-capping protein ( <b>CAPG</b> )                                                         | P40121           | 38.8/5.88    | 158          | 6                       | 23                    |
| 53                                                      | fascin homolog 1, actin bundling protein ( <i>Strongylocentrotus purpuratus</i> ) ( <b>FSCN1</b> ) | Q16658           | 55.1/6.84    | 121          | 7                       | 17                    |
| 77                                                      | capping protein (actin filament) muscle Z-line, alpha 1 ( <b>CAPZA1</b> )                          | P52907           | 33.1/5.45    | 115          | 6                       | 24                    |
| 102                                                     | tubulin beta chain ( <b>TUBB</b> )                                                                 | P07437           | 40.6/4.78    | 161          | 9                       | 19                    |
| 183                                                     | actin, gamma 1 ( <b>ACTG1</b> )                                                                    | P63261           | 26.1/5.65    | 136          | 3                       | 16                    |
| 208                                                     | twinfilin, actin binding protein ( <b>TWF1</b> )                                                   | Q12792           | 39.8/6.37    | 149          | 4                       | 20                    |
| <b>Folding of proteins and stress response proteins</b> |                                                                                                    |                  |              |              |                         |                       |
| 60                                                      | protein disulfide-isomerase (P55) ( <b>P4HB</b> )                                                  | P07237           | 57.4/4.76    | 89           | 6                       | 11                    |
| 85                                                      | 78 kDa glucose-regulated protein ( <b>HSPA5</b> )                                                  | P11021           | 72.4/5.07    | 266          | 7                       | 14                    |
| 529                                                     |                                                                                                    |                  | 72.4/5.07    | 243          | 10                      | 18                    |
| 242                                                     | heat shock 70 kDa protein 9 (mortalin) ( <b>HSPA9</b> )                                            | P38646           | 73.9/5.87    | 166          | 7                       | 13                    |
| 581                                                     |                                                                                                    |                  | 73.9/5.87    | 111          | 7                       | 15                    |
| 144                                                     | heat shock protein beta-1 (HSP 27) ( <b>HSPB1</b> )                                                | P04792           | 22.8/5.98    | 113          | 3                       | 20                    |
| 176                                                     | peptidyl-prolyl cis-trans isomerase B (cyclophilin B) ( <b>PPIB</b> )                              | P23284           | 23.7/9.42    | 93           | 6                       | 30                    |
| 207                                                     | heat shock cognate 71 kDa protein ( <b>HSPA8</b> )                                                 | P11142           | 71.1/5.37    | 227          | 9                       | 18                    |
| 254                                                     | endoplasmic reticulum protein ERp29 ( <b>ERP29</b> )                                               | P30040           | 29.0/6.77    | 126          | 4                       | 19                    |
| <b>Apoptosis</b>                                        |                                                                                                    |                  |              |              |                         |                       |
| 168                                                     | annexin A1 ( <b>ANXA1</b> )                                                                        | P04083           | 38.9/6.57    | 351          | 14                      | 49                    |
| 698                                                     |                                                                                                    |                  | 38.9/6.57    | 307          | 17                      | 50                    |
| 364                                                     | annexin A2 ( <b>ANXA2</b> )                                                                        | P07355           | 38.8/7.57    | 114          | 6                       | 21                    |
| 620                                                     |                                                                                                    |                  | 38.8/7.57    | 143          | 8                       | 25                    |
| 494                                                     | annexin A5 ( <b>ANXA5</b> )                                                                        | P08758           | 36.0/4.94    | 121          | 6                       | 20                    |
| 45                                                      | voltage-dependent anion-selective channel protein 1 ( <b>VDAC1</b> )                               | P21796           | 30.9/8.62    | 144          | 3                       | 12                    |
| <b>Vesicle trafficking</b>                              |                                                                                                    |                  |              |              |                         |                       |
| 610                                                     | septin 11 ( <b>SEPT11</b> )                                                                        | Q9NVA2           | 49.7/6.36    | 105          | 6                       | 15                    |

| Spot (nr.)                             | Protein function                                                                                       | Accession Number | MW (KDa)/ pI | Mascot score | No. of matched peptides | Sequence coverage (%) |
|----------------------------------------|--------------------------------------------------------------------------------------------------------|------------------|--------------|--------------|-------------------------|-----------------------|
| <b>Cell cycle regulation and aging</b> |                                                                                                        |                  |              |              |                         |                       |
| 15                                     | eukaryotic translation initiation factor 3, subunit F ( <b>eIF3f</b> )                                 | O00303           | 37.7/5.24    | 99           | 5                       | 19                    |
| 34                                     | eukaryotic translation initiation factor 4A3 ( <b>eIF4A3</b> )                                         | P38919           | 47.1/6.3     | 154          | 12                      | 24                    |
| 94                                     | proteasome (prosome, macropain) 26S subunit, non-ATPase, 11 ( <b>PSMD11</b> )                          | O00231           | 47.7/6.08    | 95           | 7                       | 20                    |
| 194                                    | poly (rC) binding protein 1 ( <b>PCBP1</b> )                                                           | Q15365           | 38.0/6.66    | 110          | 6                       | 23                    |
| <b>Translation pathway</b>             |                                                                                                        |                  |              |              |                         |                       |
| 138                                    | prohibitin ( <b>PHB</b> )                                                                              | P35232           | 29.8/5.57    | 101          | 5                       | 21                    |
| 156                                    | ribosomal protein SA pseudogene 58 ( <b>RPSAP58</b> )                                                  |                  | 18.7/9.64    | 126          | 2                       | 17                    |
| 239                                    | polymerase I and transcript release factor ( <b>PTRF</b> )                                             | Q6N212           | 43.5/5.51    | 82           | 5                       | 12                    |
| <b>Energy metabolism</b>               |                                                                                                        |                  |              |              |                         |                       |
| 91                                     | UDP-glucose 6-dehydrogenase ( <b>UGDH</b> )                                                            | O60701           | 55.7/6.73    | 114          | 7                       | 16                    |
| 99                                     | citrate synthase, mitochondrial ( <b>CS</b> )                                                          | O75390           | 51.9/8.45    | 90           | 5                       | 10                    |
| 109                                    | isocitrate dehydrogenase 1 (NADP+), soluble ( <b>IDH1</b> )                                            | O75874           | 35.9/6.53    | 85           | 5                       | 12                    |
| 157                                    | fructose-biphosphate aldolase A ( <b>ALDOA</b> )                                                       | P04075           | 39.8/8.30    | 163          | 6                       | 19                    |
| 166                                    | glyceraldehyde-3-phosphate dehydrogenase ( <b>GAPDH</b> )                                              | P04406           | 36.2/5.29    | 356          | 6                       | 23                    |
| 180                                    | aldo-keto reductase family 1, member A1 (aldehyde reductase) ( <b>AKRIA1</b> )                         | P14550           | 36.9/6.32    | 117          | 6                       | 18                    |
| 193                                    | glucose-6-phosphate dehydrogenase ( <b>G6PD</b> )                                                      | P11413           | 59.8/6.39    | 121          | 7                       | 15                    |
| 250                                    | chain A, structure of human glutamate dehydrogenase-Apo form ( <b>IL1F_A</b> )                         | P00367           | 56.3/6.71    | 187          | 12                      | 30                    |
| 540                                    | ATP synthase, H <sup>+</sup> transporting, mitochondrial F1 complex, beta polypeptide ( <b>ATP5B</b> ) | P06576           | 56.5/5.26    | 135          | 9                       | 27                    |
| 993                                    | prolyl 4-hydroxylase, alpha polypeptide II ( <b>P4HA2</b> )                                            | Q05DA4           | 57.7/5.45    | 137          | 8                       | 16                    |
| <b>Lipid metabolism</b>                |                                                                                                        |                  |              |              |                         |                       |
| 97                                     | enoyl-CoA hydratase, short chain, 1, mitochondrial ( <b>ECHS1</b> )                                    | P30084           | 31.8/8.34    | 114          | 6                       | 23                    |
| 139                                    | acetyl-CoA acetyltransferase ( <b>ACAT2</b> )                                                          | Q9BWD1           | 41.8/6.47    | 107          | 3                       | 11                    |
| <b>Muscle development</b>              |                                                                                                        |                  |              |              |                         |                       |
| 111                                    | lamin A/C ( <b>LMNA</b> )                                                                              | P02545           | 57.7/6.40    | 133          | 4                       | 11                    |
| 126                                    |                                                                                                        |                  | 65.1/6.40    | 176          | 12                      | 25                    |
| 257                                    |                                                                                                        |                  | 74.4/6.57    | 97           | 8                       | 14                    |
| 451                                    |                                                                                                        |                  | 74.3/6.40    | 107          | 7                       | 11                    |
| <b>Neuronal differentiation</b>        |                                                                                                        |                  |              |              |                         |                       |
| 151                                    | dihydropyrimidinase-like 2 ( <b>DPYSL2</b> )                                                           | Q16555           | 68.6/5.85    | 84           | 5                       | 10                    |
| 483                                    |                                                                                                        |                  | 662.7/5.85   | 85           | 6                       | 13                    |
